# Supplementary material
Source: PubMed Central journal article supplement (PMC3951938)
Supplement: mmc1.pdf [file mmc1.pdf]

The American Journal of Human Genetics, Volume 94

**Supplemental Data**

**A Higher Mutational Burden in Females**

**Supports a “Female Protective Model”**

**in Neurodevelopmental Disorders**

Sébastien Jacquemont, Bradley P. Coe, Micha Hersch, Michael H. Duyzend, Niklas Krumm, Sven Bergmann, Jacques S. Beckmann, Jill A. Rosenfeld, and Evan E. Eichler

**Figure S1.** Distribution of CNVs across gender in general population cohorts.

WTCCC2, 1213 females, 1302 males

|                 |      |     |              |             |
|-----------------|------|-----|--------------|-------------|
| CNVs in male    | 7834 | 190 | 62           | 7           |
| CNVs in female  | 7444 | 207 | 89           | 17          |
| p val. binomial | ns   | ns  | <b>0.007</b> | <b>0.03</b> |

ARIC, 4806 females, 3927 males

|                 |       |     |      |    |
|-----------------|-------|-----|------|----|
| CNVs in male    | 18246 | 633 | 185  | 37 |
| CNVs in female  | 22248 | 713 | 176  | 34 |
| p val. binomial | ns    | ns  | 0.02 | ns |

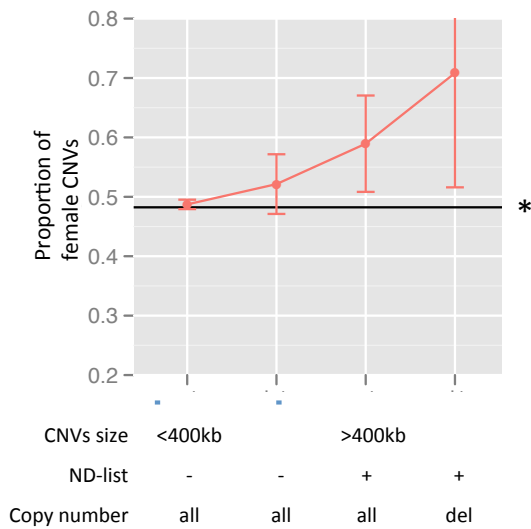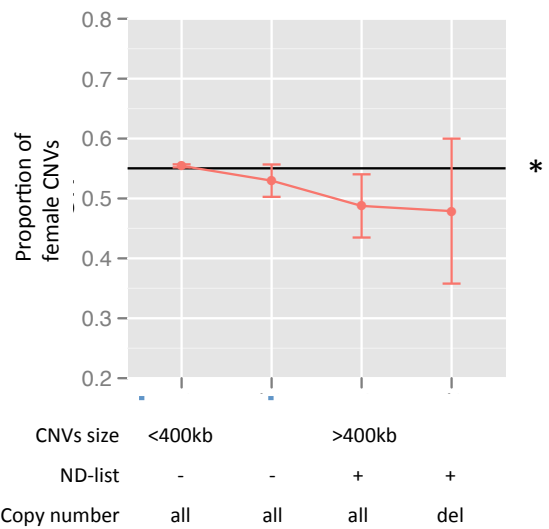

Legend : \* The black horizontal line represents the proportion of females in the cohort : (0.48 in this subset of the WTCCC2 and 0.55 in ARIC ). Only individuals of European descent and CNVs present in less than 1% of the data set were included in the analysis. The p-value (exact binomial test) refers to the probability that the proportion of CNVs observed in females and males is different from the gender ration of the cohort (black horizontal line). Error bars represent the 95<sup>th</sup> Confidence interval for proportion of female CNVs.

**Table S1: Datasets investigated in this study**

| Ascertainment<br>Gender           | proband |         | siblings |         | Variants<br>analyzed | Phenotypes<br>studied | Ref            |
|-----------------------------------|---------|---------|----------|---------|----------------------|-----------------------|----------------|
|                                   | males   | females | males    | females |                      |                       |                |
| Signature Genomics (SG)           | 9206    | 6379    | -        | -       | CNVs                 | NA                    | <sup>1</sup>   |
| SSC, CNV data subset <sup>1</sup> | 653     | 109     |          |         | CNVs                 | IQ, SRS               | <sup>2</sup>   |
| SSC, SNV data subset <sup>1</sup> | 226     | 98      |          |         | SNVs                 | IQ, SRS               | <sup>3,4</sup> |
| SG, Inheritance subset            | 1826*   |         | -        | -       | CNVs                 | NA                    |                |
| ISCA, Inheritance data subset     | 1735 *  |         | -        | -       | CNVs                 | NA                    |                |

\* All CNVs with data on inheritance were included but gender was not always available.

ISCA: International Standards for Cytogenomic Arrays

(1) The overlap between these two subsets includes 181 males and 56 females

**Table S2A:** Increased frequency of deleteriousness variants in females ascertained for ASD

| Mutation type                |                      | <b>Probands</b> <sup>3</sup><br>226 males, 98 females |                          |             |                          | <b>Unaffected siblings</b> <sup>3</sup><br>70 males, 82 females |                          |            |                          |
|------------------------------|----------------------|-------------------------------------------------------|--------------------------|-------------|--------------------------|-----------------------------------------------------------------|--------------------------|------------|--------------------------|
|                              |                      | missense<br>C-score >20                               |                          | Truncating  |                          | Missense<br>C-score >20                                         |                          | Truncating |                          |
|                              |                      | all                                                   | ND or<br>BE <sup>2</sup> | all         | ND or<br>BE <sup>2</sup> | all                                                             | ND or<br>BE <sup>2</sup> | all        | ND or<br>BE <sup>2</sup> |
| All<br>SNVs                  | n=                   | 25081                                                 | 3794                     | 1787        | 163                      | 11000                                                           | 1645                     | 798        | 80                       |
|                              | <sup>1</sup> OR      | 1.01                                                  | 1.01                     | <b>1.1</b>  | <b>1.34</b>              | 0.98                                                            | 0.98                     | 0.92       | 0.86                     |
|                              | <sup>1</sup> p value | ns                                                    | ns                       | <b>0.03</b> | <b>0.04</b>              | ns                                                              | ns                       | ns         | ns                       |
| Proband<br>-specific<br>SNVs | n=                   | 20164                                                 | 3066                     | 1430        | 129                      | -                                                               | -                        | -          | -                        |
|                              | <sup>1</sup> OR      | 1.02                                                  | 0.99                     | 1.09        | 1.30                     | -                                                               | -                        | -          | -                        |
|                              | <sup>1</sup> p value | ns                                                    | ns                       | 0.06        | 0.09                     | -                                                               | -                        | -          | -                        |

1: The Fisher's exact test (one-sided) tested the contingency table counting the number of nonsynonymous variants with and without the specific deleterious criteria (C-score >20, Truncating variant, ) detailed in mutation type and filter (line 2 and 3 of the table).

2: ND-genes : genes involved in NDs (cf. methods). BE: genes with an expression ranked in the top 5% of all genes expressed in the brain (cf. methods). 3: Of European descent.

**Table S2B:** Increased deleteriousness of non-synonymous variants in females ascertained for ASD in the SSC.

|            | All SNVs |                |                       | Missense variants |                       |                       | All SNVs in ND-genes |                       |                       | Missense variants in ND-genes |                       |                       |
|------------|----------|----------------|-----------------------|-------------------|-----------------------|-----------------------|----------------------|-----------------------|-----------------------|-------------------------------|-----------------------|-----------------------|
|            | n=       | <sup>2</sup> m | <i>p</i> <sup>1</sup> | n=                | <i>m</i> <sup>2</sup> | <i>p</i> <sup>1</sup> | n=                   | <i>m</i> <sup>2</sup> | <i>p</i> <sup>1</sup> | n=                            | <i>m</i> <sup>2</sup> | <i>p</i> <sup>1</sup> |
| top 1 % *M | 466      | 1136           | <b>0.01</b>           | 253               | 24.7                  | ns                    | 51                   | 511                   | <b>0.0006</b>         | 28                            | 24.8                  | ns                    |
| *F         | 197      | 1183           |                       | 106               | 24.7                  |                       | 21                   | 1484                  |                       | 11                            | 24.6                  |                       |
| top 5 % M  | 2330     | 40             | <b>0.002</b>          | 1267              | 23.5                  | ns                    | 258                  | 24                    | <b>0.001</b>          | 140                           | 23.5                  | ns                    |
| F          | 985      | 43             |                       | 534               | 23.5                  |                       | 107                  | 25                    |                       | 57                            | 23.6                  |                       |
| top 10 % M | 4661     | 23.1           | <b>0.003</b>          | 2535              | 22.8                  | ns                    | 516                  | 22.7                  | <b>0.002</b>          | 280                           | 22.9                  | <b>0.03</b>           |
| F          | 1970     | 23.3           |                       | 1069              | 22.8                  |                       | 215                  | 23.1                  |                       | 115                           | 23.1                  |                       |
| top 20 % M | 9323     | 21.4           | <b>0.01</b>           | 5070              | 21.8                  | ns                    | 1033                 | 21.2                  | <b>0.01</b>           | 560                           | 22                    | <b>0.03</b>           |
| F          | 3941     | 21.5           |                       | 2138              | 21.8                  |                       | 431                  | 21.4                  |                       | 230                           | 22.2                  |                       |
| top 30 % M | 13984    | 19.8           | <b>0.05</b>           | 7605              | 21                    | ns                    | 1549                 | 19.7                  | ns                    | 840                           | 21.2                  | <b>0.02</b>           |
| F          | 5912     | 19.9           |                       | 3207              | 21                    |                       | 647                  | 20                    |                       | 345                           | 21.4                  |                       |
| top 50% M  | 23307    | 14             | ns                    | 12675             | 18.9                  | ns                    | 2583                 | 13.7                  | ns                    | 1400                          | 19.4                  | ns                    |
| F          | 9853     | 14.1           |                       | 5346              | 18.9                  |                       | 1079                 | 13.7                  |                       | 576                           | 19.7                  |                       |

The deleteriousness of non-synonymous variants is significantly higher in females when compared to males ascertained for ASD. Truncating variants mainly drive this increased burden and the gender bias is the highest for variants involving ND-genes. Missense variants present only a marginal excess of deleteriousness in female probands. Raw C-scores of non-synonymous variants were compared between males and females. To perform the analysis on the most deleterious variants, we stratified the sample based on the top 1, 5, 10, 20, 30 and 50 percent of the C-Score distribution (cf method <sup>5</sup>).

<sup>1</sup> p values were computed by means of a Wilcoxon rank sum test. Significant p values demonstrate an increased median of C-score in females compared to males.

<sup>2</sup> m: Median

\*M, F = values for Males and Females.

**Table S3A:** Increased maternal inheritance of deleterious SNVs in the SSC cohort.

| Ascertainment               | Mutation type<br>filter | Proband, n= 324               |       |            |              | Siblings, n= 152              |       |            |       |
|-----------------------------|-------------------------|-------------------------------|-------|------------|--------------|-------------------------------|-------|------------|-------|
|                             |                         | Non-synonymous<br>C-score >20 |       | Truncating |              | Non-synonymous<br>C-score >20 |       | Truncating |       |
|                             |                         | all                           | ND/BE | all        | ND/BE        | all                           | ND/BE | all        | ND/BE |
| SNVs                        | n=                      | 24865                         | 3756  | 1736       | 151          | 10943                         | 1647  | 785        | 77    |
|                             | Maternal ratio          | 0.50                          | 0.51  | 0.51       | <b>0.59</b>  | 0.49                          | 0.50  | 0.48       | 0.46  |
|                             | p <sup>1</sup> =        | 0.42                          | 0.07  | 0.16       | <b>0.017</b> | 0.09                          | 0.77  | 0.39       | 0.64  |
| Proband<br>specific<br>SNVs | n=                      | 19951                         | 3029  | 1381       | 117          | -                             | -     | -          | -     |
|                             | Maternal ratio          | 0.50                          | 0.51  | 0.52       | 0.59         | -                             | -     | -          | -     |
|                             | p <sup>1</sup> =        | 0.51                          | 0.21  | 0.11       | <b>0.032</b> | -                             | -     | -          | -     |

1: binomial test, maternal ratio is significantly higher than 50%.

C-score >20 is a deleteriousness criteria based on the Combined Annotation Dependent Depletion (CADD) <sup>5</sup>.

ND-genes: genes involved in NDs (cf. methods). BE: genes with an expression ranked in the top 5% of all genes expressed in the brain (cf. methods).

**Table S3B:** Increased deleteriousness of maternally compared to paternally inherited autosomal non-synonymous variants in probands with ASD in the SSC.

|          |          | All non-synonymous variants |                |                | Missense variants |                |                | All non-synonymous variants in ND-genes |                |                | Missense variants in ND-genes |                |                |
|----------|----------|-----------------------------|----------------|----------------|-------------------|----------------|----------------|-----------------------------------------|----------------|----------------|-------------------------------|----------------|----------------|
|          |          | n=                          | <sup>2</sup> m | <sup>1</sup> p | n=                | <sup>2</sup> m | <sup>1</sup> p | n=                                      | <sup>2</sup> m | <sup>1</sup> p | n=                            | <sup>2</sup> m | <sup>1</sup> p |
| top 1 %  | Paternal | 32                          | 3479           | ns             | 178               | 24             | ns             | 35                                      | 766            | ns             | 19                            | 24.4           | <b>0.03</b>    |
|          | Maternal | 32                          | 3102           |                | 178               | 24             |                | 36                                      | 679            |                | 19                            | 24.8           |                |
| top 5 %  | Paternal | 327                         | 1136           | <b>0.003</b>   | 892               | 23             | ns             | 179                                     | 23.7           | <b>0.007</b>   | 96                            | 23.4           | <b>0.01</b>    |
|          | Maternal | 329                         | 1168           |                | 894               | 23             |                | 182                                     | 24.2           |                | 98                            | 23.7           |                |
| top 10 % | Paternal | 1639                        | 37             | 0.05           | 1785              | 23             | ns             | 359                                     | 22.7           | <b>0.005</b>   | 193                           | 22.8           | 0.07           |
|          | Maternal | 1648                        | 42             |                | 1788              | 23             |                | 364                                     | 22.8           |                | 197                           | 23             |                |
| top 20 % | Paternal | 3279                        | 23             | ns             | 3570              | 22             | ns             | 719                                     | 21.1           | <b>0.01</b>    | 386                           | 23             | ns             |
|          | Maternal | 3297                        | 23             |                | 3577              | 22             |                | 728                                     | 21.4           |                | 394                           | 23             |                |
| top 30 % | Paternal | 6556                        | 21             | ns             | 5355              | 21             | ns             | 1079                                    | 19.5           | <b>0.01</b>    | 579                           | 21.2           | ns             |
|          | Maternal | 6594                        | 21             |                | 5365              | 21             |                | 1093                                    | 19.8           |                | 591                           | 21.2           |                |
| top 50 % | Paternal | 16391                       | 20             | ns             | 8926              | 20             | ns             | 1799                                    | 13.3           | <b>0.02</b>    | 965                           | 19.3           | ns             |
|          | Maternal | 16485                       | 20             |                | 8943              | 20             |                | 1822                                    | 13.7           |                | 986                           | 19.5           |                |

The deleteriousness of non-synonymous variants inherited from the mother is significantly higher than those inherited from the father. This increased burden in maternally compared to paternally inherited variants is mainly driven by truncating variants involving ND-genes.

Missense variants only contribute marginally to this difference. Raw C-scores of non-synonymous variants inherited from the mother were compared to those inherited from the father. To perform the analysis on the most deleterious variants, we stratified the sample based on the top 1, 5, 10, 20, 30 and 50 percent of the C-Score distribution.

<sup>1</sup> p values were computed by means of a Wilcoxon rank sum test. Significant p values demonstrate increased C-score maternally versus paternally inherited variants.

<sup>2</sup> m: Median. FDR correction was not applied because only 1 hypothesis was tested at several cutoffs.

**Table S4:** cognitive and behavioral differences between gender in different SSC subsets.

|                         | Total SSC *  |        |                     | CNV subset  |        |         | SNV subset (n=231+102) |        |                    |
|-------------------------|--------------|--------|---------------------|-------------|--------|---------|------------------------|--------|--------------------|
|                         | (n=1961+308) |        |                     | (n=651+109) |        |         |                        |        |                    |
|                         | male         | female | p value             | male        | female | P value | male                   | female | P value            |
| FSIQ <sup>1</sup>       | 83           | 75     | 2×10 <sup>-5</sup>  | 85          | 75     | 5E-4    | 77                     | 69     | 0.03               |
| PIQ <sup>1</sup>        | 87           | 79     | 3×10 <sup>-7</sup>  | 89          | 76     | 6E-6    | 81                     | 72     | 5×10 <sup>-3</sup> |
| VIQ <sup>1</sup>        | 80           | 75     | 0.016               | 82          | 75     | 5%      | 73                     | 68     | 0.28               |
| SRS Tscore <sup>2</sup> | 80           | 90     | 2×10 <sup>-17</sup> | 80          | 90     | 5E-7    | 82                     | 90     | 7×10 <sup>-6</sup> |

1: mean and t-test.

2: median and Wilcoxon rank sum test, due to non normal distribution.

\* : IQ distribution is identical to what was reported in earlier stages of the SSC (1631 males + 256 females) <sup>6</sup>

**Table S5:** regression analyses exploring the relationship between “CNV burden” in probands, gender and global cognition.

| Explained variable | Covariate | CNV burden in proband <sup>2</sup> |                                    |
|--------------------|-----------|------------------------------------|------------------------------------|
|                    |           | P-value                            | Effect size [unit/Mb] <sup>3</sup> |
| PIQ                | -         | 0.001                              | -4.9                               |
| VIQ                | -         | 0.02                               | -4.1                               |
| PIQ                | gender    | 0.003                              | -4.2                               |
| VIQ                | gender    | 0.04                               | -3.6                               |
| Gender*            | -         | 0.004                              | -0.52                              |
| Gender*            | PIQ       | 0.009                              | -0.46                              |
| Gender*            | VIQ       | 0.005                              | -0.5                               |

Two-sided regression tests

\* logistic regression test

2: Sum of length of CNVs containing a “ND-gene”

3: IQ point per megabase (linear regression)



**Table S6:** regression analyses exploring the relationship between “SNV burden”, gender and global cognition.

| Explained variable | Covariate | proband SNV burden <sup>2</sup> |                          |
|--------------------|-----------|---------------------------------|--------------------------|
|                    |           | P-value                         | Effect size [unit/ratio] |
| PIQ                | -         | 0.30                            | ns                       |
| VIQ                | -         | 0.20                            | ns                       |
| PIQ                | Gender    | 0.21                            | ns                       |
| VIQ                | Gender    | 0.35                            | ns                       |
| Gender*            | -         | 0.05                            | 18.9                     |
| Gender*            | PIQ       | 0.05                            | 18.9                     |
| Gender*            | VIQ       | 0.06                            | 18.4                     |

Two-sided regression tests

\* logistic regression test

2: Ratio of total SNVs truncating ND-genes or the BE-genes over the total number of synonymous SNVs per individual.

**Table S7:** CNVs on the X chromosome and combined X and autosome burden analysis.

| <b>X-linked CNVs</b>                | <b>Male</b>     | <b>Female</b> | <b>OR <sup>4</sup></b> | <b>p-value <sup>4</sup></b> |
|-------------------------------------|-----------------|---------------|------------------------|-----------------------------|
| 45 X                                | NA <sup>1</sup> | 14            | -                      | -                           |
| XXX / XXY <sup>2</sup>              | 24              | 15            | 0.9                    | 0.9                         |
| >400 kb                             | 129             | 129           | 1,45                   | <b>0.003</b>                |
| >1 Mb                               | 30              | 39            | 1.88                   | <b>0.009</b>                |
| <1%, >400 kb <sup>3</sup> , ND-list | 67              | 82            | 1.8                    | <b>5×10<sup>-4</sup></b>    |
| <1%, >1 Mb <sup>3</sup> , ND-list   | 27              | 50            | 2.7                    | <b>2×10<sup>-4</sup></b>    |

| <b>Estimating Autosomal + X-linked burden <sup>5</sup></b> | <b>Male</b> | <b>Female</b>         | <b>OR <sup>7</sup></b> | <b>p-value <sup>7</sup></b> |
|------------------------------------------------------------|-------------|-----------------------|------------------------|-----------------------------|
| >400 kb <sup>3</sup>                                       | 2764 + 136  | 2152 + 0 <sup>6</sup> | 1.1                    | <b>0.003</b>                |
| >1 Mb <sup>3</sup>                                         | 1425 + 37   | 1212 + 0 <sup>6</sup> | 1.24                   | <b>6×10<sup>-6</sup></b>    |
| <1 %, >400 kb, ND-list                                     | 1610 + 67   | 1309 + 0 <sup>6</sup> | 1.15                   | <b>3×10<sup>-4</sup></b>    |
| <1 %, >1 Mb <sup>3</sup> , ND-list                         | 1183 + 27   | 1031 + 0 <sup>6</sup> | 1.27                   | <b>1×10<sup>-7</sup></b>    |
| <0.1%, >400 kb <sup>3</sup> , ND-list                      | 857 + 67    | 743 + 0 <sup>6</sup>  | 1.2                    | <b>0.001</b>                |
| <0.1%, >1 Mb <sup>3</sup> , ND-list                        | 576+ 27     | 567 + 0 <sup>6</sup>  | 1.39                   | <b>6×10<sup>-8</sup></b>    |

**Legend:**

CNV data from 9206 males and 6379 females ascertained for NDs (Signature Genomics).

1: The Y chromosome was not analyzed so it was not possible to count 45X males.

2: Aneuploidies (XXY and XXX) occur at an equal rate in both genders.

3: Aneuploidies (XXY and XXX) were excluded from these analyses since they occur at an equal rate in both genders and do not present with a more severe phenotype in males. Common *SHOX* and *STS* deletions were also excluded since they are not associated with neurodevelopmental symptoms.

4: Odds ratio (OR) and associated p-values represent the enrichment of X-linked CNVs in females compared to males in this group.

5: To estimate how the X-linked burden affects the results of this study, we performed the same analysis presented in Figure 1 (main text) and added the X-linked burden to the autosomal burden in males only.

6: In this very conservative approach, we considered that the X-linked burden is null in females.

7: Odds ratio (OR) and associated p-values represent the excess of mutational burden in females after accounting for the X-linked CNVs in males.

<1%, and < 0.1% relates to the frequency in the general population: rare and very rare variants.

**Table S8:** Comparison of behavioral and cognitive phenotypes in 1961 male probands and 308 females probands from the SSC.

| Cognitive / behavior measure                       | Male                          | Female                     | p-value                                       |
|----------------------------------------------------|-------------------------------|----------------------------|-----------------------------------------------|
| FSIQ <sup>1</sup>                                  | 83                            | 75                         | <b>2×10<sup>-5</sup></b>                      |
| PIQ <sup>1</sup>                                   | 87                            | 79                         | <b>3×10<sup>-7</sup></b>                      |
| VIQ <sup>1</sup>                                   | 80                            | 75                         | <b>0.016</b>                                  |
| SRS <sup>2</sup>                                   | 80                            | 90                         | <b>2×10<sup>-17</sup></b>                     |
| VABS <sup>1</sup>                                  | 74                            | 71                         | <b>4×10<sup>-4</sup></b>                      |
| CBCL                                               |                               |                            |                                               |
| Externalizing 6-18 <sup>1</sup>                    | 56                            | 57.2                       | 0.09                                          |
| Internalizing 6-18 <sup>1</sup>                    | 60.3                          | 59.3                       | 0.1                                           |
| ABC <sup>1</sup>                                   | 45.9                          | 47.7                       | ns                                            |
| ADOS                                               |                               |                            |                                               |
| Mean age at ADOS<br>Module 1, 2 and 3 <sup>3</sup> | 8.9 years<br>n=333, 423, 1150 | 8.9 years<br>n= 64, 91,144 | ns<br><b>p=8×10<sup>-5</sup>,<br/>OR=1.63</b> |
| Restricted repetitive behaviors <sup>1</sup>       | 3.97                          | 3.95                       | ns                                            |
| Social affect <sup>1</sup>                         | 9.4                           | 9                          | ns                                            |
| Social + communication <sup>1</sup>                | 13.2                          | 13.7                       | 0.07                                          |
| Calibrated severity scores <sup>1</sup>            | 7.42                          | 7.37                       | ns                                            |
| Seizures <sup>4</sup>                              | 79, 60, 42                    | 12, 10, 9                  | ns                                            |

Legend:

1: Mean score and t-test.

2: Median and Wilcoxon rank sum test, due to non-normal distribution.

3: Comparison of the number of males and females who qualified for module 1, 2 or 3 of the ADOS. Males are higher functioning and there is therefore an enrichment for module 3 in males when compared to females.

4: Non-febrile seizures: 1, 2, 3+ seizures, Fisher's exact test.

## Supplemental References.

1. Cooper, G.M., Coe, B.P., Girirajan, S., Rosenfeld, J.A., Vu, T.H., Baker, C., Williams, C., Stalker, H., Hamid, R., Hannig, V., et al. (2011). A copy number variation morbidity map of developmental delay. *Nat. Genet.* *43*, 838–846.
2. Sanders, S.J., Ercan-Sencicek, A.G., Hus, V., Luo, R., Murtha, M.T., Moreno-De-Luca, D., Chu, S.H., Moreau, M.P., Gupta, A.R., Thomson, S.A., et al. (2011). Multiple recurrent de novo CNVs, including duplications of the 7q11.23 Williams syndrome region, are strongly associated with autism. *Neuron* *70*, 863–885.
3. O’Roak, B.J., Vives, L., Girirajan, S., Karakoc, E., Krumm, N., Coe, B.P., Levy, R., Ko, A., Lee, C., Smith, J.D., et al. (2012). Sporadic autism exomes reveal a highly interconnected protein network of de novo mutations. *Nature* *485*, 246–250.
4. Sanders, S.J., Murtha, M.T., Gupta, A.R., Murdoch, J.D., Raubeson, M.J., Willsey, A.J., Ercan-Sencicek, A.G., DiLullo, N.M., Parikshak, N.N., Stein, J.L., et al. (2012). De novo mutations revealed by whole-exome sequencing are strongly associated with autism. *Nature* *485*, 237–241.
5. Kircher, M., Witten, D.M., O’Roak, B.J., Cooper, G.M., and Shendure, J. A general framework for estimating the relative pathogenicity of human genetic variants. *Nat. Genet.* *in press*.
6. Fischbach, G.D., and Lord, C. (2010). The Simons Simplex Collection: A Resource for Identification of Autism Genetic Risk Factors. *Neuron* *68*, 192–195.
